# Supplementary material for: Nanoencapsulated Quercetin Improves Cardioprotection during Hypoxia-Reoxygenation Injury through Preservation of Mitochondrial Function
Source: PubMed Central journal article supplement (PMC6612997; doi:10.1155/2019/7683051), 2019-06-24

# Supplementary Figure 1

A)

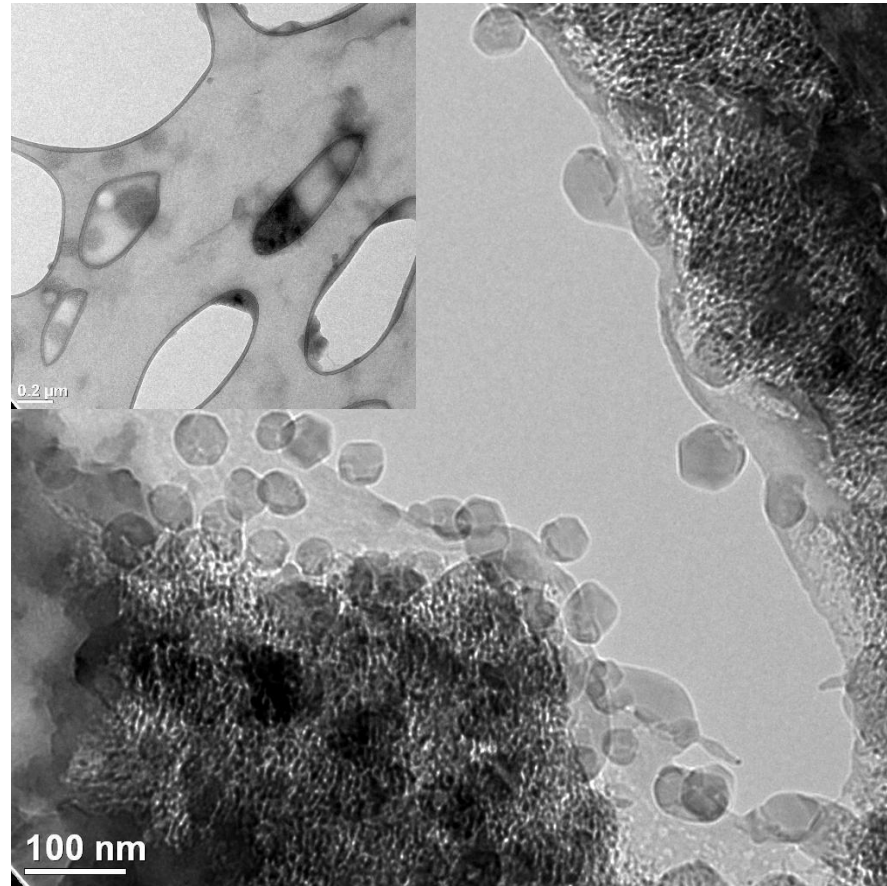

B)

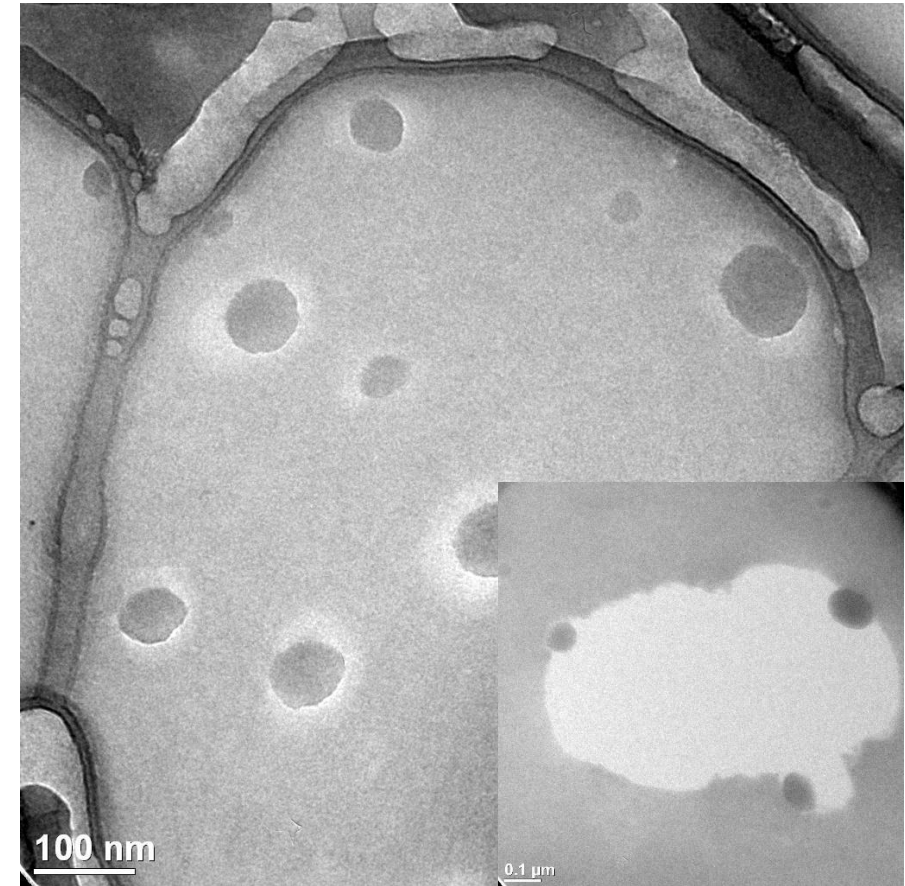

# Supplementary Figure 2

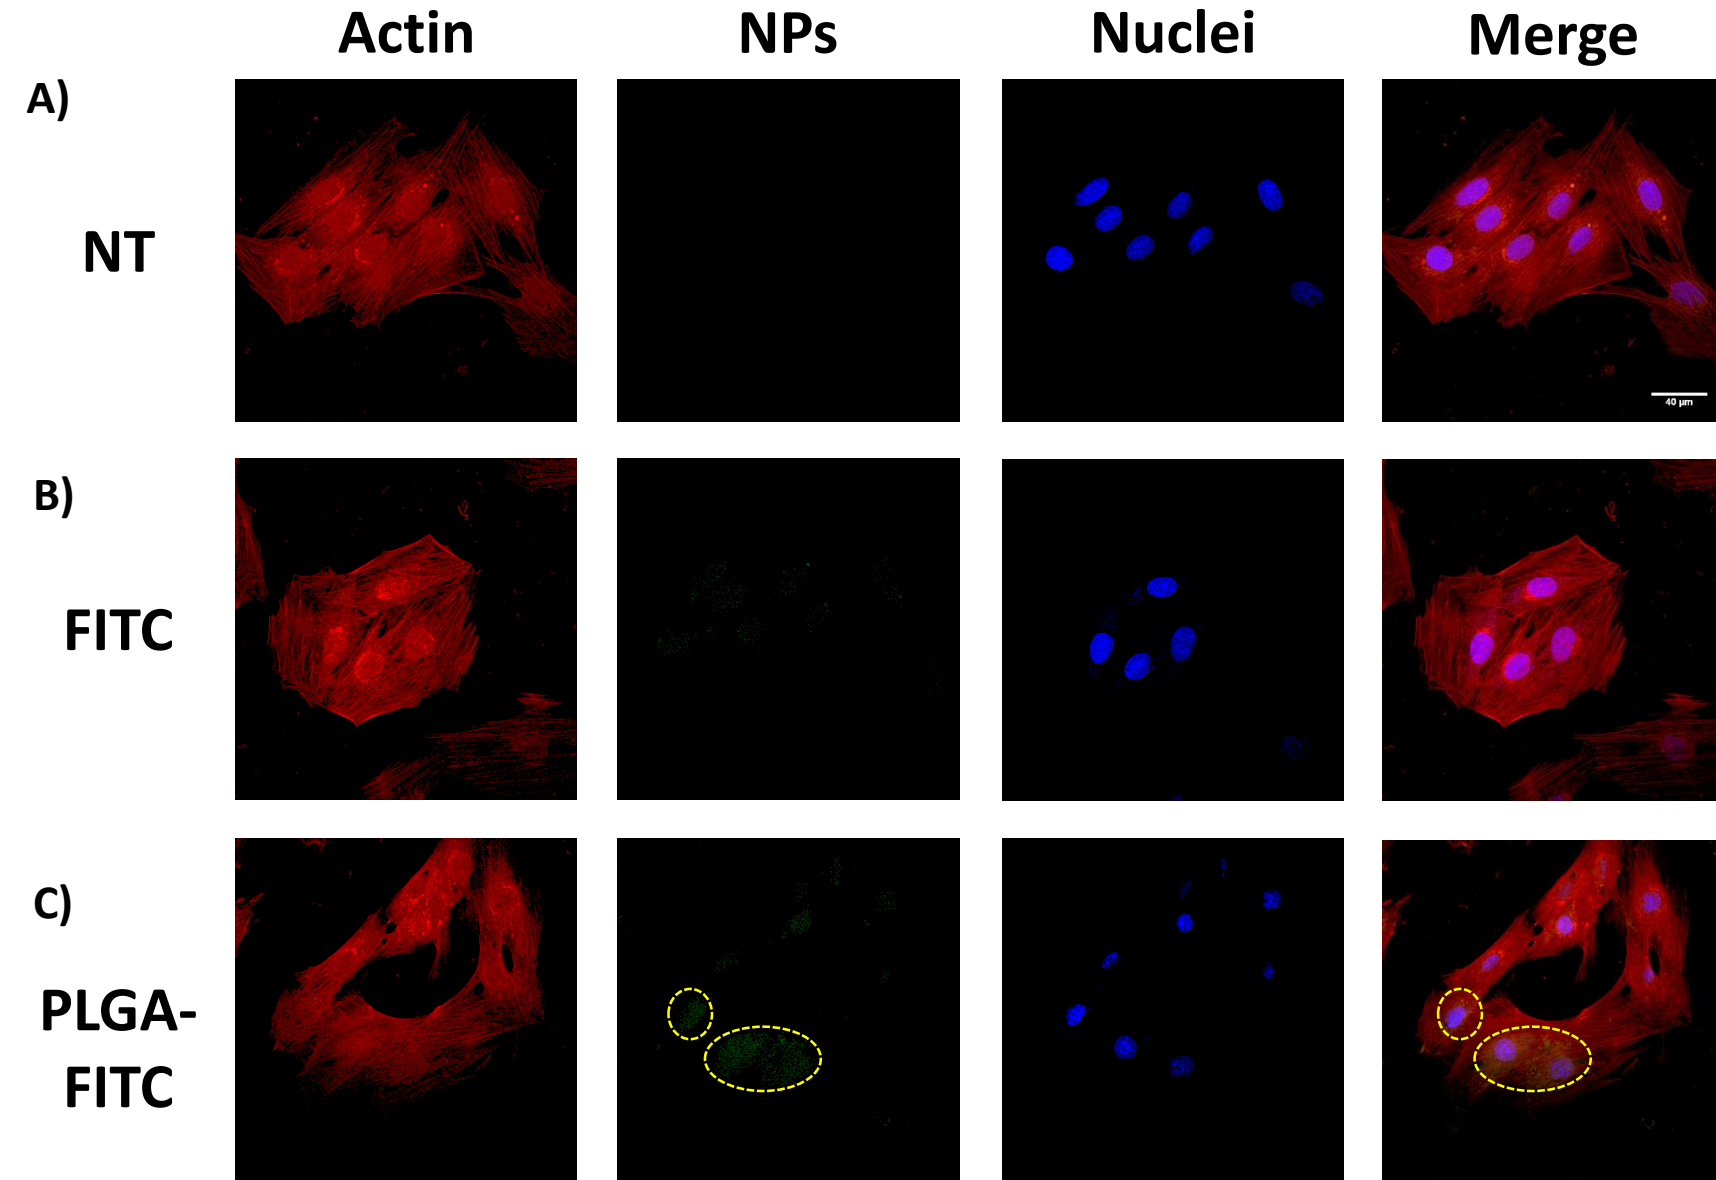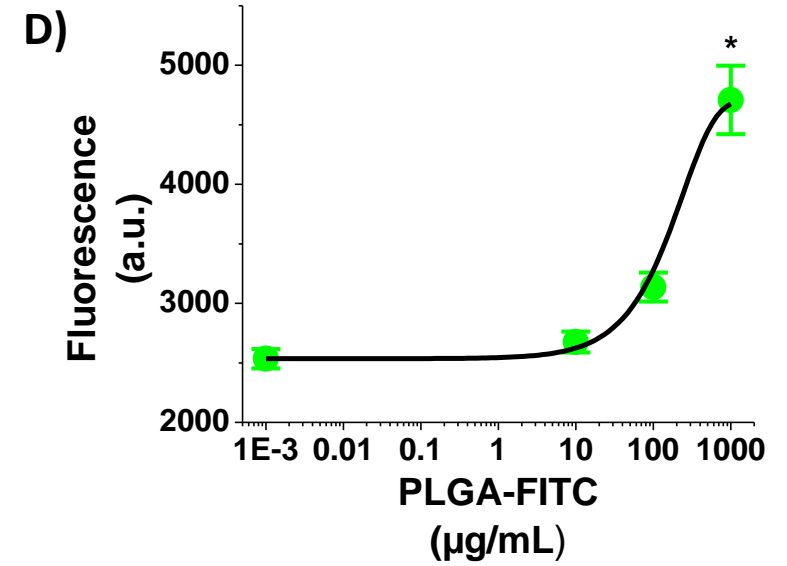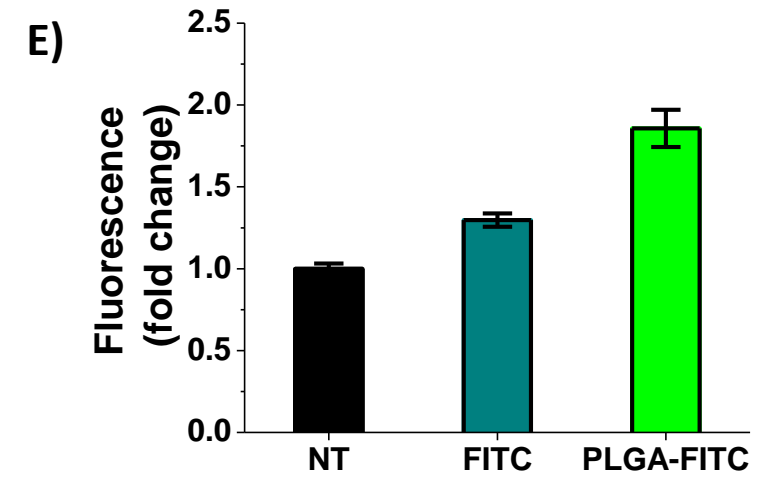

# Supplementary Figure 3

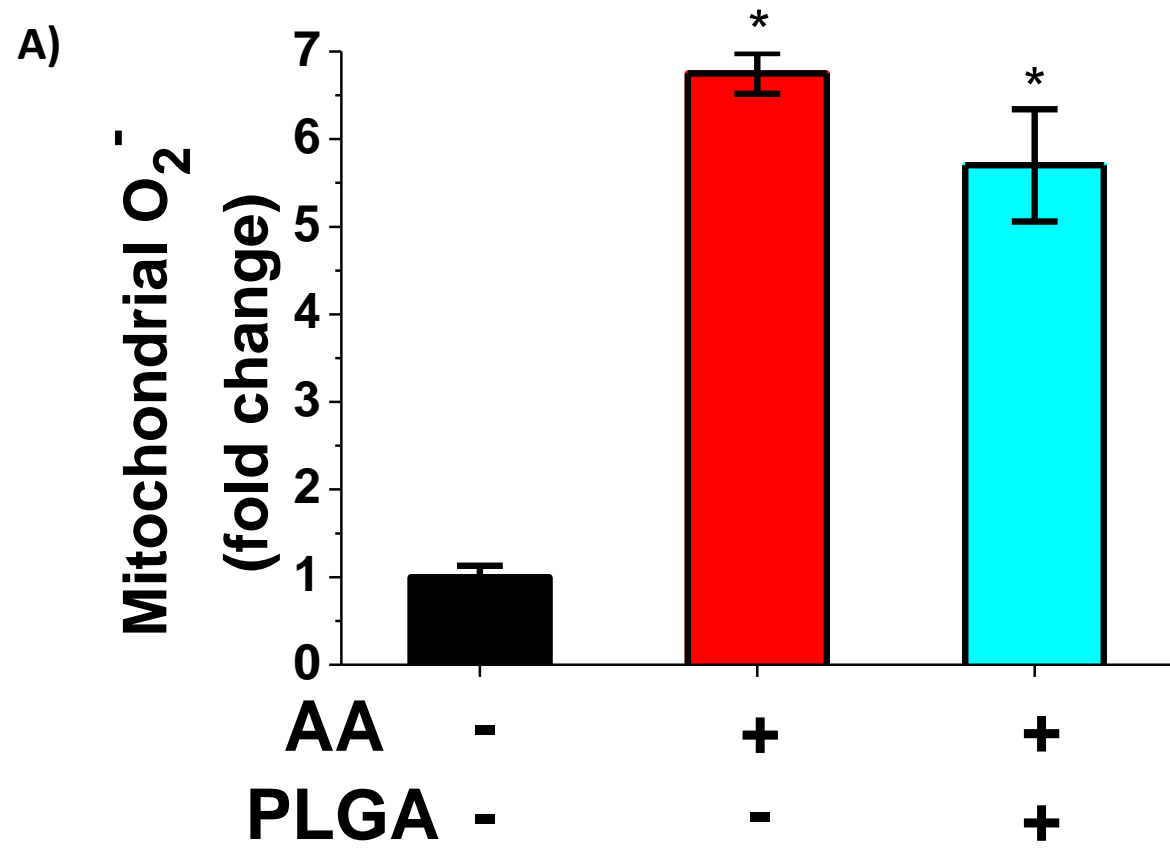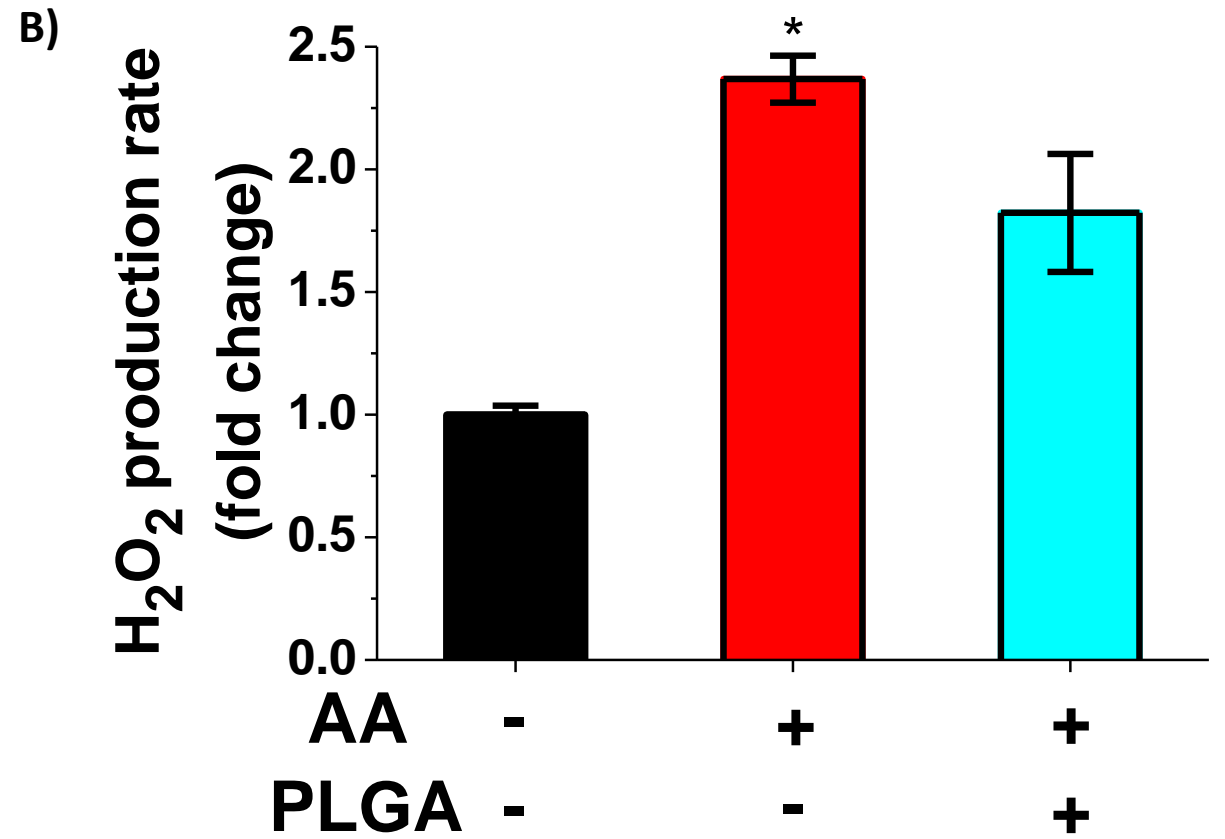

# Supplementary Figure 4

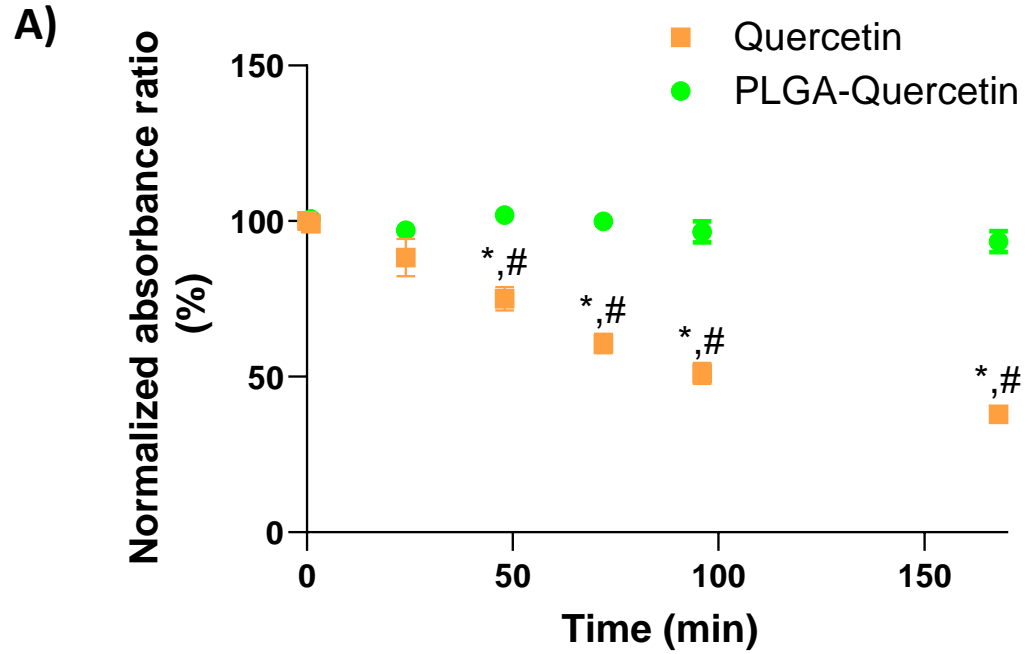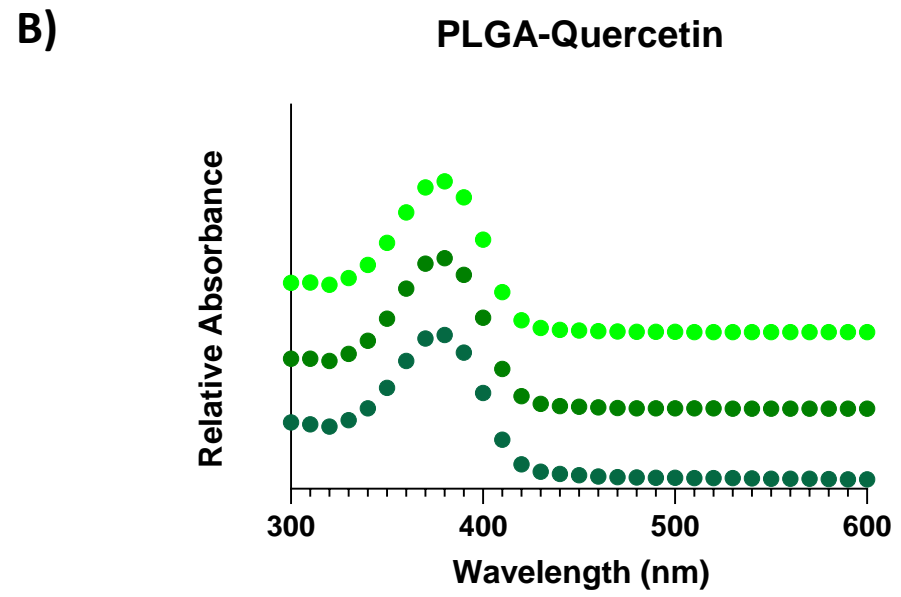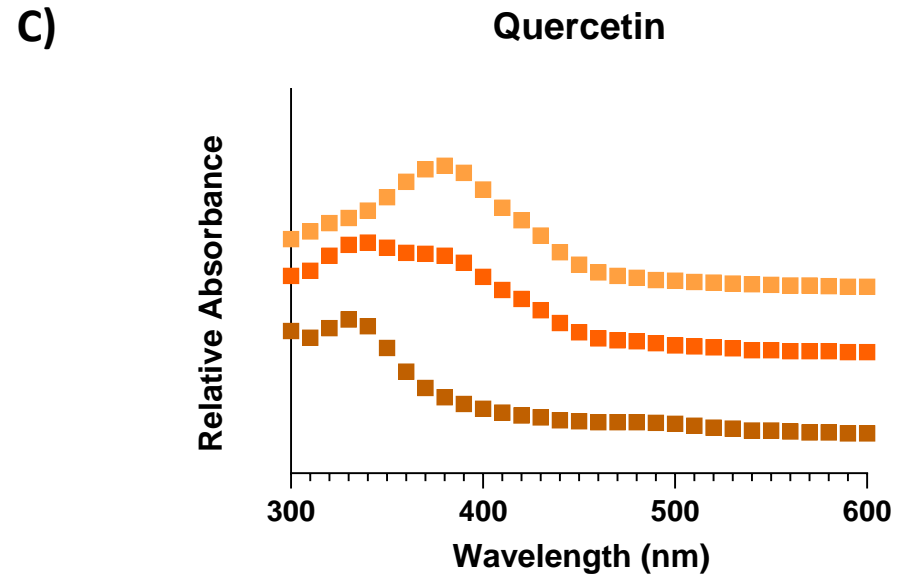

Supplementary Figure 5

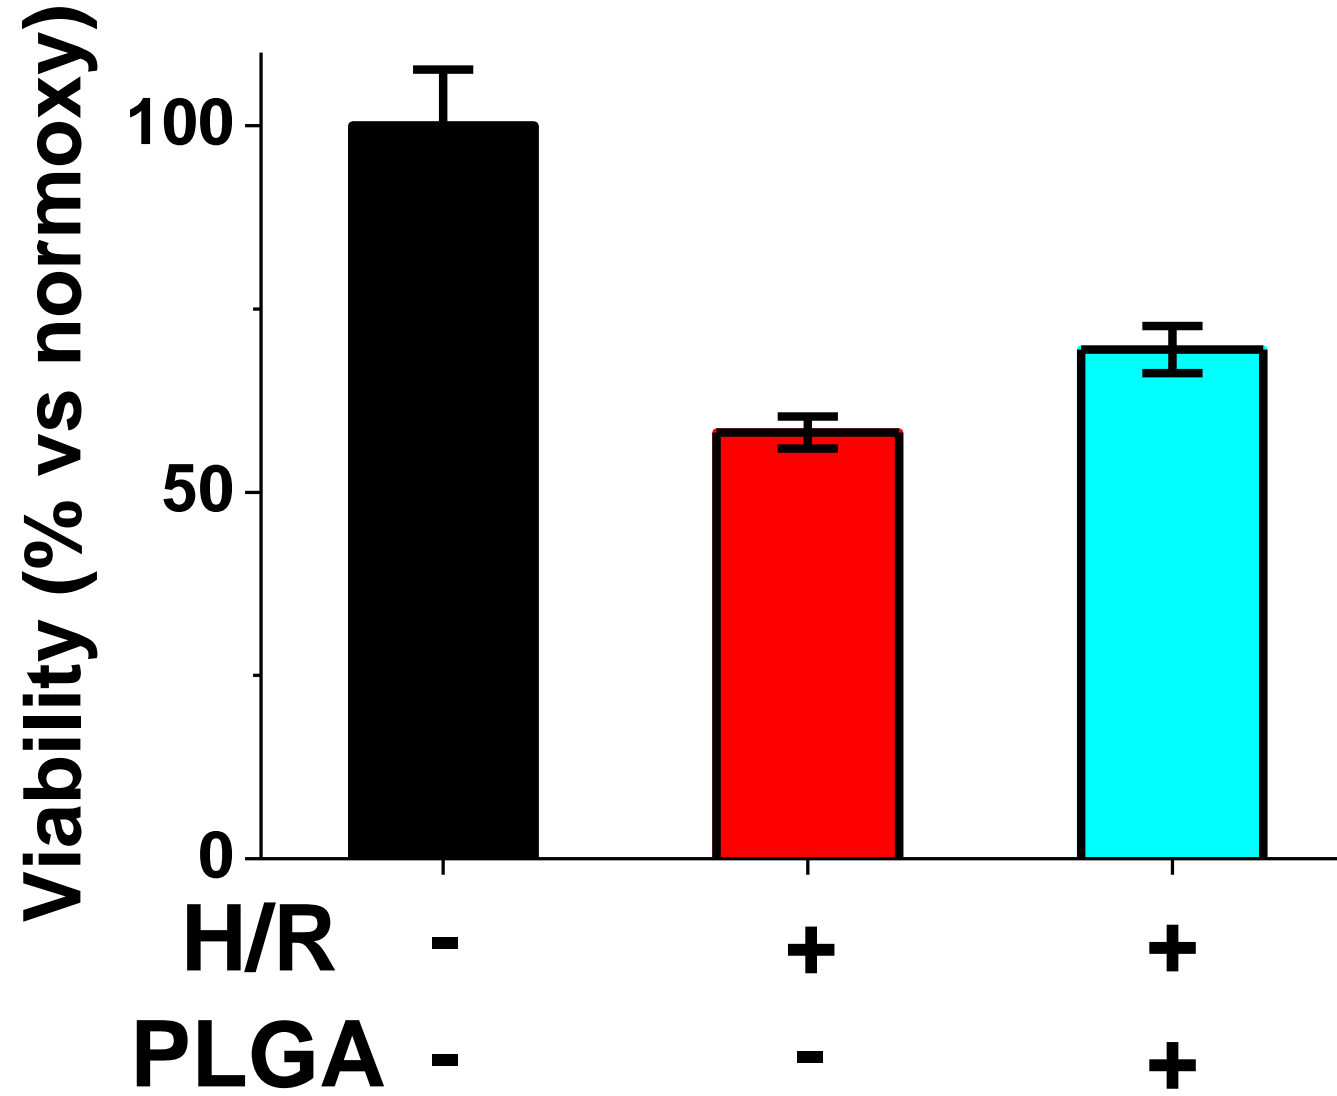

# Supplementary Figure 6

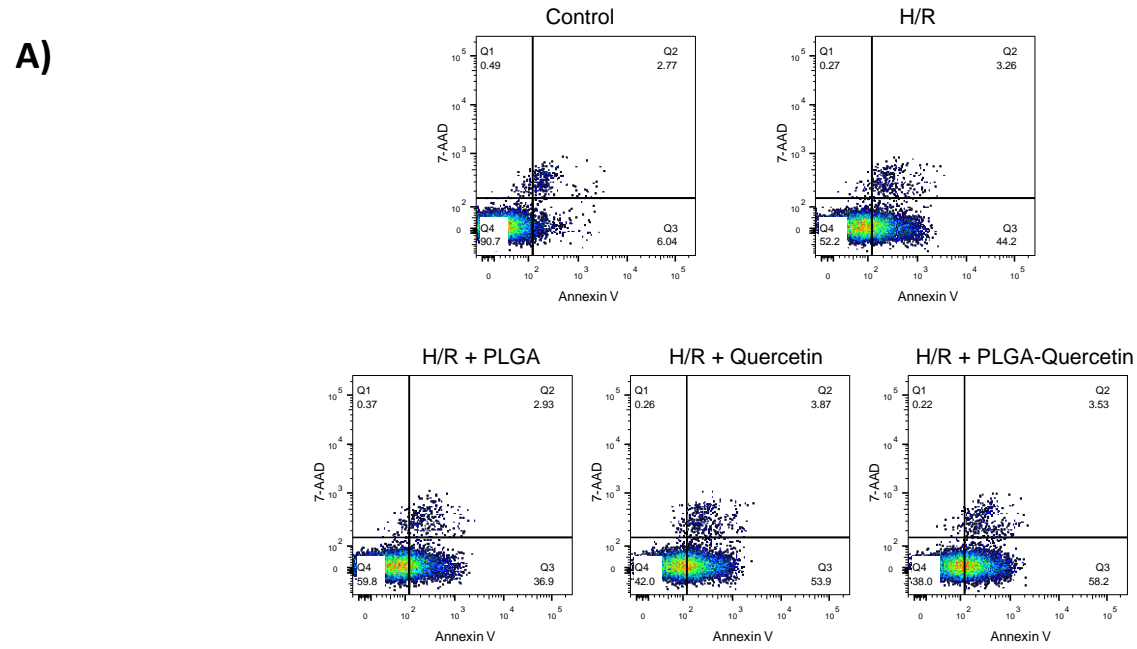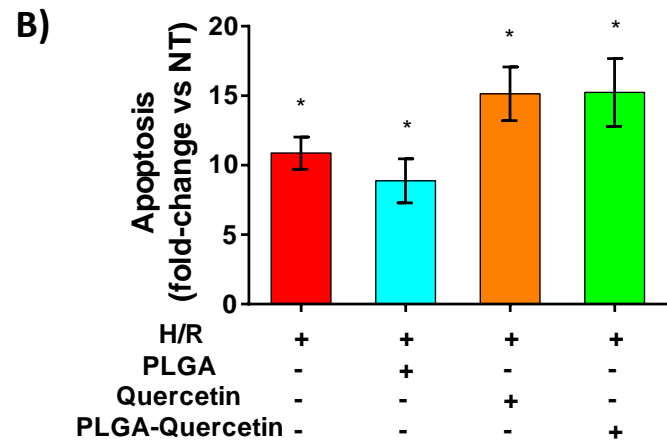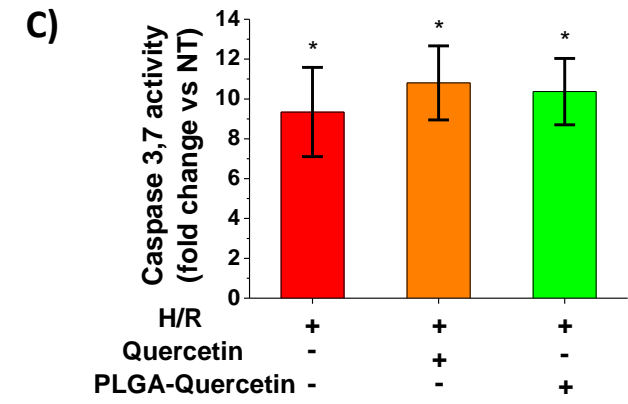

Supplement: 7683051.f1.pdf [file 7683051.f1.pdf]
